# Supplementary material for: The increase in cell death rates in caloric restricted cells of the yeast helicase mutant rrm3 is Sir complex dependent
Source: PubMed Central journal article supplement (PMC10587150; doi:10.1038/s41598-023-45125-z), 2023-10-19
Supplement: 41598_2023_45125_MOESM1_ESM.pdf [file 41598_2023_45125_MOESM1_ESM.pdf]

## Supplemental Information

### The increase in cell death rates in caloric restricted cells of the yeast helicase mutant *rrm3* is Sir complex dependent

Andreas S. Ivessa<sup>1,3</sup> and Sukhwinder Singh<sup>2</sup>

<sup>1</sup>Department of Cell Biology and Molecular Medicine

<sup>2</sup>Pathology and Laboratory Medicine/Flow Cytometry and Immunology Core Laboratory

Rutgers New Jersey Medical School

Rutgers Biomedical and Health Sciences

185 South Orange Avenue

Newark, NJ 07101-1709

U.S.A.

<sup>3</sup>Corresponding Author and Lead Contact:

Email: [ivessaan@njms.rutgers.edu](mailto:ivessaan@njms.rutgers.edu)

This section includes Supplemental Results (five figures and figure legends), tables for primer sequences (Table S1), used yeast strains (Table S2) and materials (Table S3), uncropped images for PCR-gels (for Figures 1 and 3) and western-blot (for Figures 4 and 5) (other images are displayed in their entire size).

**Supplement Figure 1: Control experiment for determining the DNA breakage rate by the terminal deoxynucleotidyl transferase (TdT) assay combined with PCR and schema of ribosomal DNA (rDNA)**

**A.** Schema of determining the DNA breakage rate by the terminal deoxynucleotidyl transferase (TdT) assay combined with PCR. In the top panel, the DNA was cut with the restriction enzyme *after* extending the DNA breaks with the biotinylated-dCTP tags, thus here only natural DNA breaks are detected. In the bottom panel, the DNA was cut with the restriction enzyme *prior* to extending the DNA breaks with the biotinylated-dCTP tags, thus here natural *and* artificially created DNA breaks are detected. **B.** Agarose gels displaying the PCR products for fragment *YFH1* (see Figure 1) for WT yeast cells. (-) and (+) biotin-dCTP refer to “no addition” or “addition” of biotin-dCTP to the TdT reaction. The intensity of the bands in the gels was determined by using the program ImageLab (Bio-Rad™ Laboratories, Hercules, CA). Each pellet value was first normalized by the input value, then the (-)-biotin-dCTP value (i.e., background) was subtracted from the (+)-biotin-dCTP value. Experiments were carried out three times. Standard errors are shown. The conclusion of the control experiment is that the DNA breakage rates are higher in the samples which were digested with the restriction enzyme *prior* to extending the DNA breaks with the biotinylated-dCTP tags, thus an increased number of dsDNA breaks were present. **C.** Schema of ribosomal DNA (rDNA). The regions of fragment #1 and #2 in rDNA are indicated which were amplified by PCR (see Figure 1). The 9.1 kbp single repeat can be split into two equal parts by digestion with *Bgl*II (*Bgl* A and B). *ARS*: autonomous replicative sequence; *RFB*: replication fork barrier.

**A**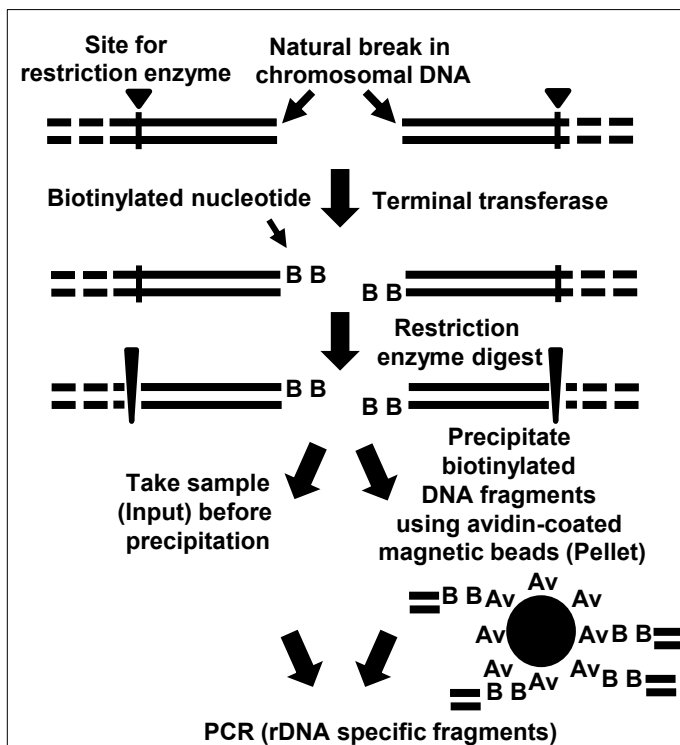**B**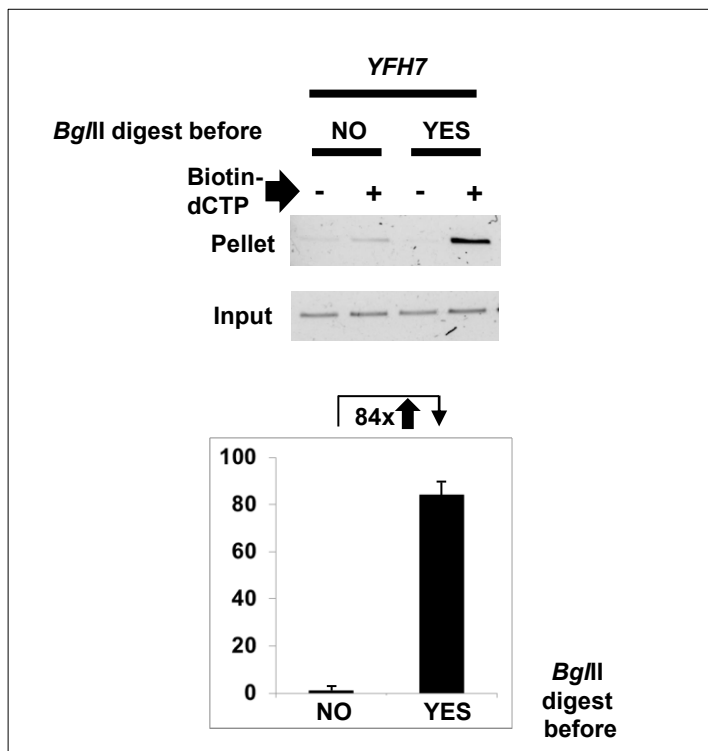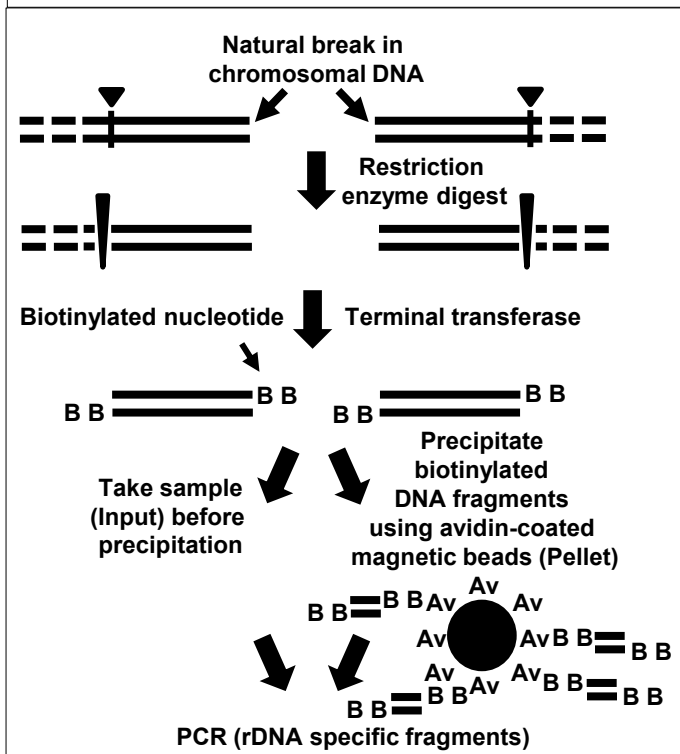**C**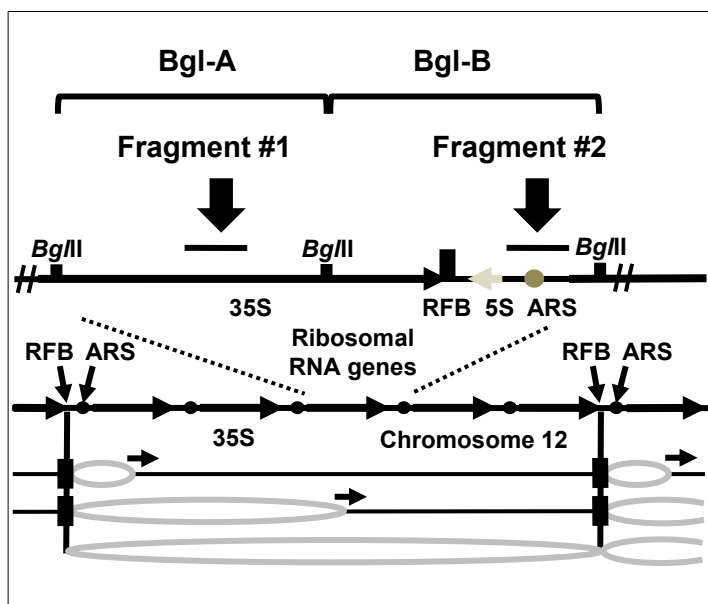

**Supplement Figure 2: Numbers of propidium iodide (PI)-stained *rrm3* mutant cells (indicating dying or dead cells) are low under normal growth conditions (2% glucose) and increased under calorie-restricted growth conditions**

Cells of the indicated strains were grown in medium containing 2% or 0.05% glucose to an early logarithmic phase ( $OD_{600} \sim 0.1$ ). Representative microscopic images display PI-stained cells (orange) and the corresponding brightfield images (PI-staining superimposed). Bar: 50 $\mu$ m. Used strains are (in parenthesis are the approximate average cell numbers in the displayed images as determined by the program imageJ <sup>1</sup>): WT, pRS315 (2%: 1350; CR: 1300); *rrm3*, pRS315-*RRM3* (2%: 1400; CR: 1100); *rrm3*, pRS315 (2%: 1300; CR: 1500); *rrm3*, pRS315-*rrm3* (K260A) (2%: 1200; CR: 1400); *rrm3*, pRS315-*rrm3* (K260R) (2%: 1400; CR: 1900). The two alleles *rrm3* (K260A) and *rrm3* (K260R) are properly expressed as previously demonstrated <sup>2</sup>. The histogram of the percentage of PI-stained cells is displayed in Figure 3A. Experiments were carried out three times.

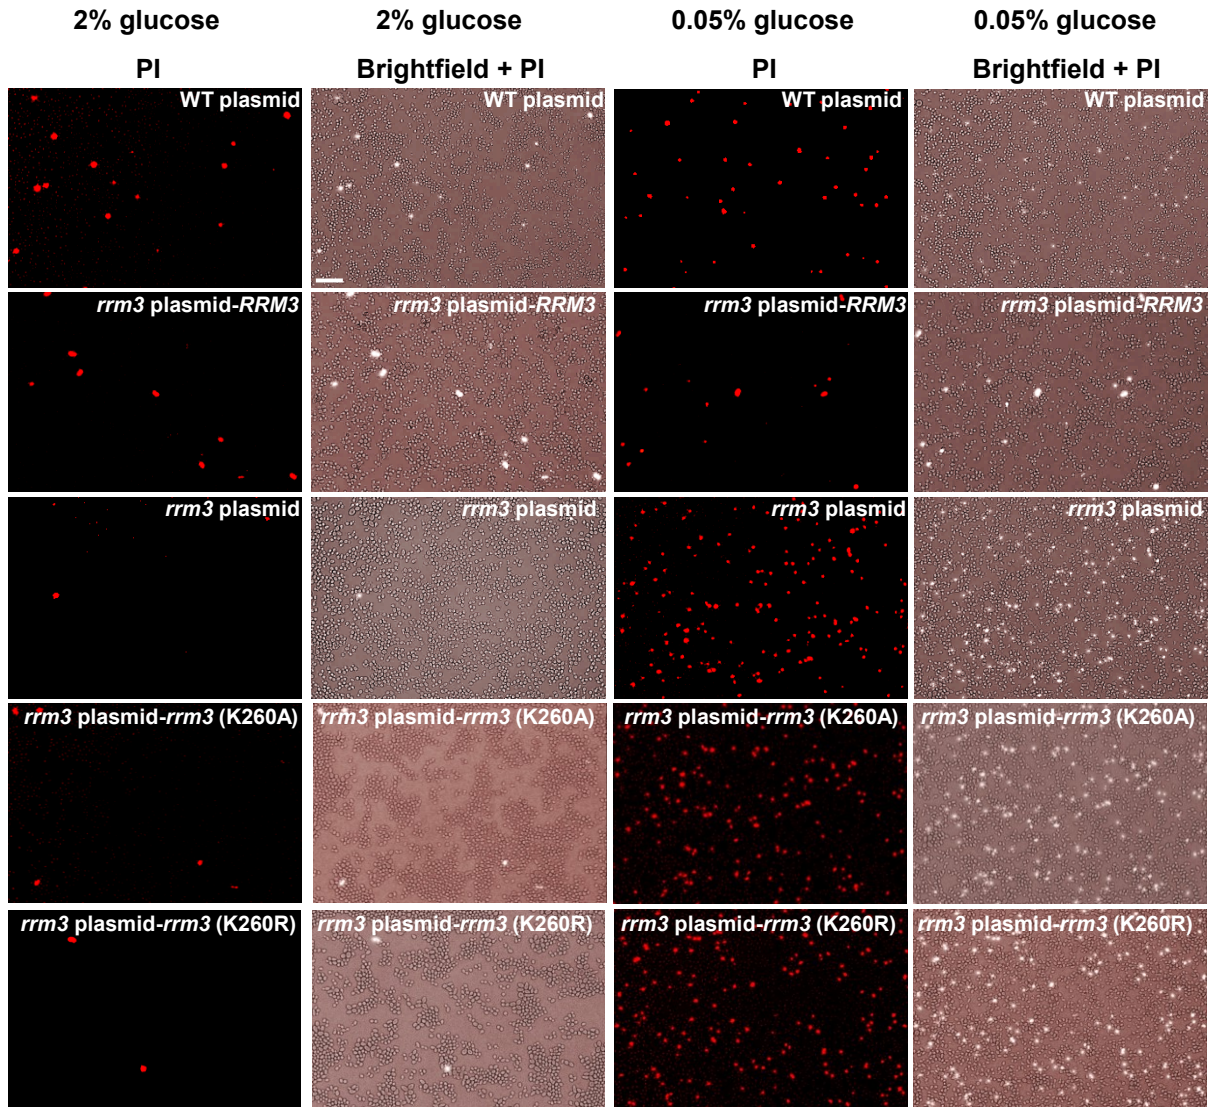

**Supplement Figure 3: Whereas the absence of Pif1, Rad52 or Hdf1 has no influence on the increase in the number of PI-stained cells of *rrm3* mutant cells, which are transferred from growth medium containing 2% glucose to CR-medium, the absence of Hxk2 has a partial effect.**

Cells of the indicated strains were grown in medium containing 2% or 0.05% glucose to an early logarithmic phase ( $OD_{600} \sim 0.1$ ). Representative microscopic images display PI-stained cells (orange) and the corresponding brightfield images (PI-staining superimposed (except for *hvk2* and *hvk2 rrm3*)). Bar: 50 $\mu$ m. Used strains are (in parenthesis are the approximate average cell numbers in the displayed images as determined by the program imageJ <sup>1</sup>): WT (2%: 1000; CR: 800), *rrm3* (2%: 900; CR: 950), *pif1-m2* (2%: 900; CR: 650), *pif1-m2 rrm3* (2%: 700; CR: 600), *rad52* (2%: 500; CR: 300), *rad52 rrm3* (2%: 450; CR: 400), *hdf1* (2%: 1300; CR: 480), *hdf1 rrm3* (2%: 1000; CR: 900), *hvk2* (2%: 900; CR: 800), *hvk2 rrm3* (2%: 800; CR: 800). The histogram displaying percentage of PI-stained cells is shown in Figure 3E. Experiments were carried out three times.

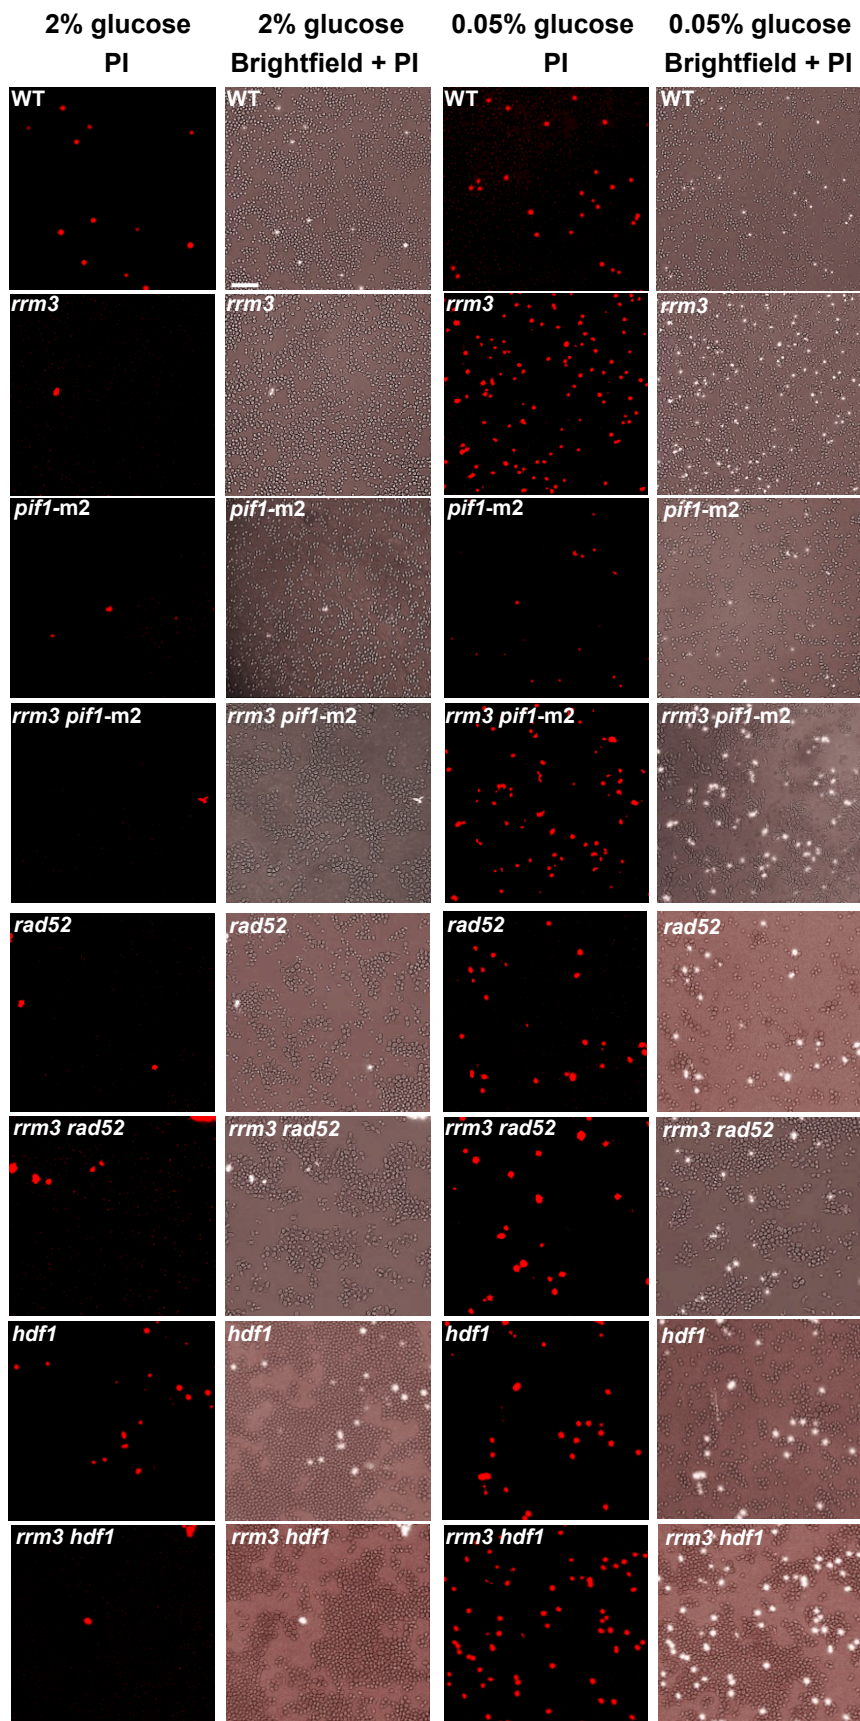

Supplement Figure 3  
Ivessa and Singh

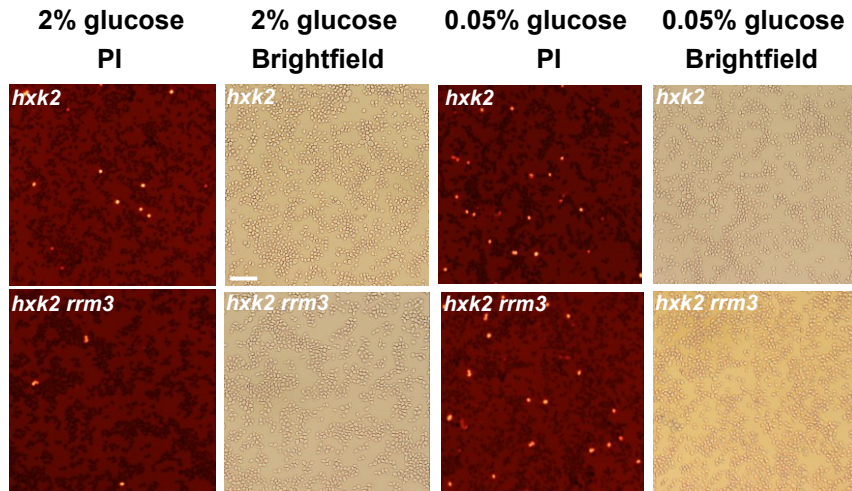



**Supplement Figure 4: The Sir2/Sir3/Sir4 complex is needed for the increase of the number of PI-stained cells of CR-*rrm3* mutant cells**

Cells of the indicated strains were grown in medium containing 2% or 0.05% glucose to an early logarithmic phase ( $OD_{600} \sim 0.1$ ). Representative microscopic images display PI-stained cells (orange) and the corresponding brightfield images (PI-staining superimposed). Bar: 50 $\mu$ m. Used strains are (in parenthesis are the approximate average cell numbers in the displayed images as determined by the program imageJ <sup>1</sup>): WT (2%: 750; CR: 650), *rrm3* (2%: 650; CR: 600), *sir2* (2%: 450; CR: 700), *sir2 rrm3* (2%: 450; CR: 450), *sir3* (2%: 500; CR: 500), *sir3 rrm3* (2%: 700; CR: 450), *sir4* (2%: 500; CR: 450), *sir4 rrm3* (2%: 600; CR: 700). The histogram displaying percentage of PI-stained cells is shown in Figure 5A. Experiments were carried out three times.

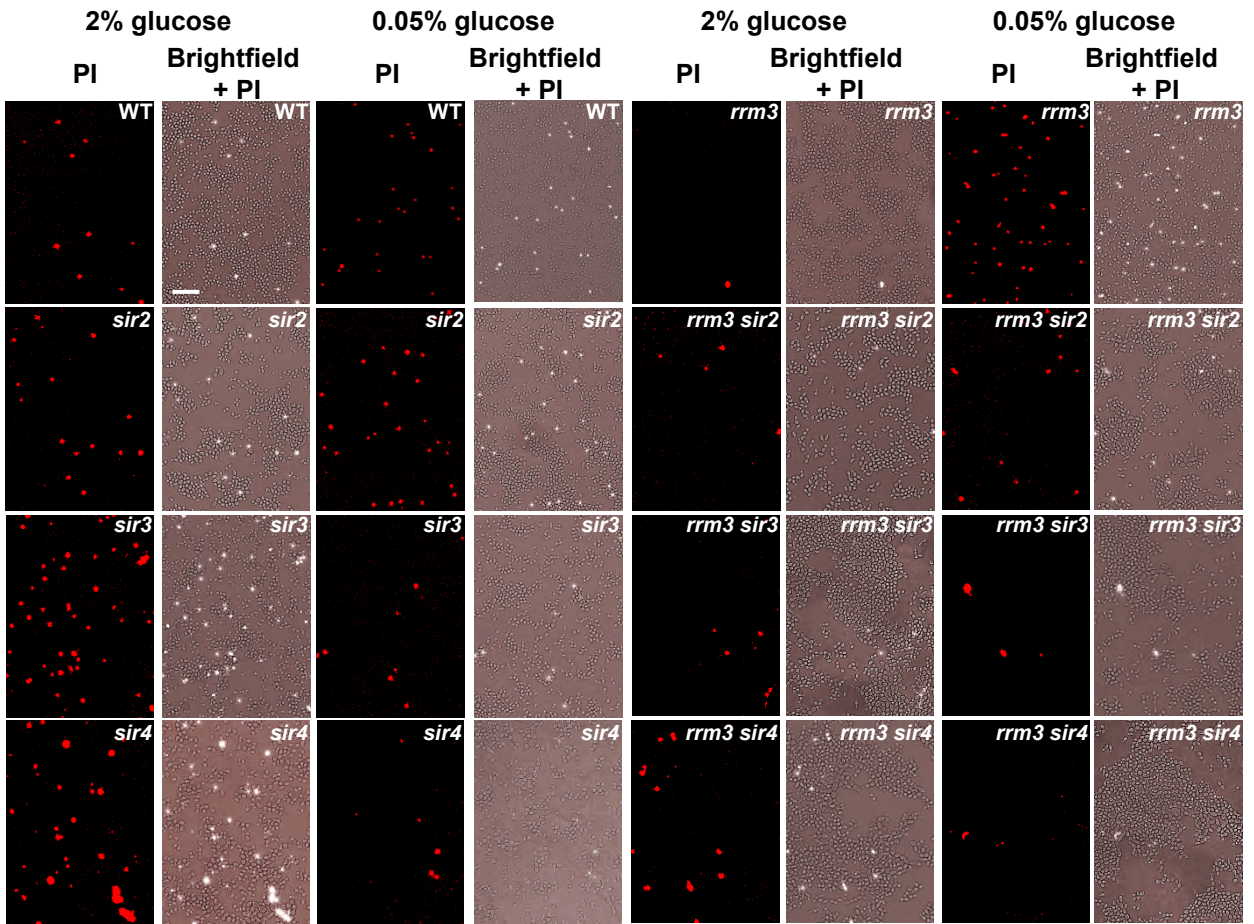

Supplement Figure 4  
Ivessa and Singh

**Supplement Figure 5: Reduction of mitochondrial oxidative stress lowers cell death rates in CR-*rrm3* cell populations**

**A.** Microscopic images display double-stained cells with propidium iodide (PI; orange) and Singlet Oxygen Sensor Green (SOSG; green) with superposition of the brightfield image. Red asterisks indicate cells, which are SOSG-positive, but PI-negative. Bar: 50µm.

**B.** Microscopic images of the indicated strains grown in medium containing 2% or 0.05% (CR) glucose display double-stained cells with Singlet Oxygen Sensor Green (SOSG; green) and MitoTracker Red CMXRos (red). Bar: 50µm.

**C.** *rrm3* mutant cells were grown under CR conditions in the absence or presence of the mitochondrial antioxidant Mito-TEMPO (160 µM final concentration). Microscopic images display propidium iodide (PI) stained cells (orange) and Singlet Oxygen Sensor Green (SOSG; green) with superposition of the brightfield image. Bar: 50µm.

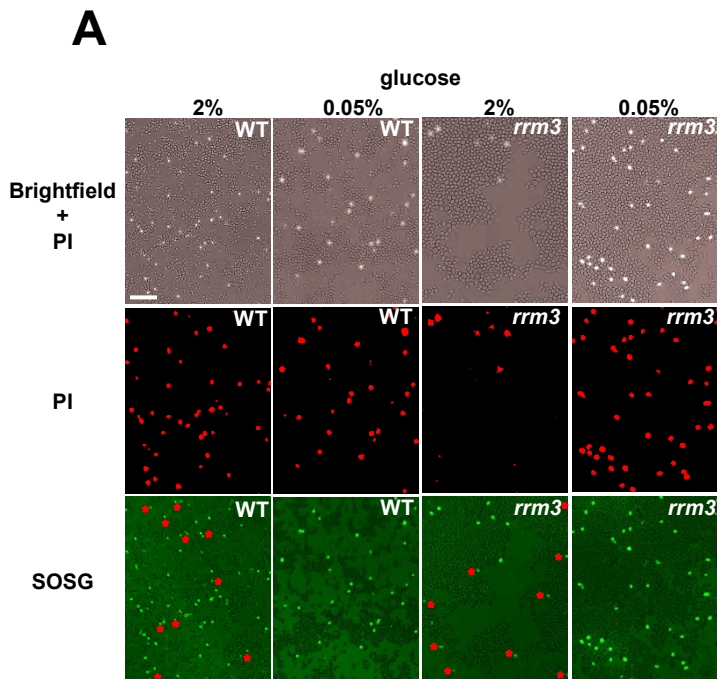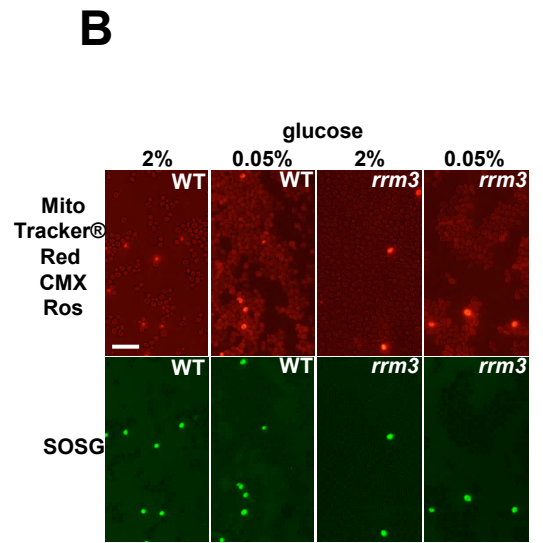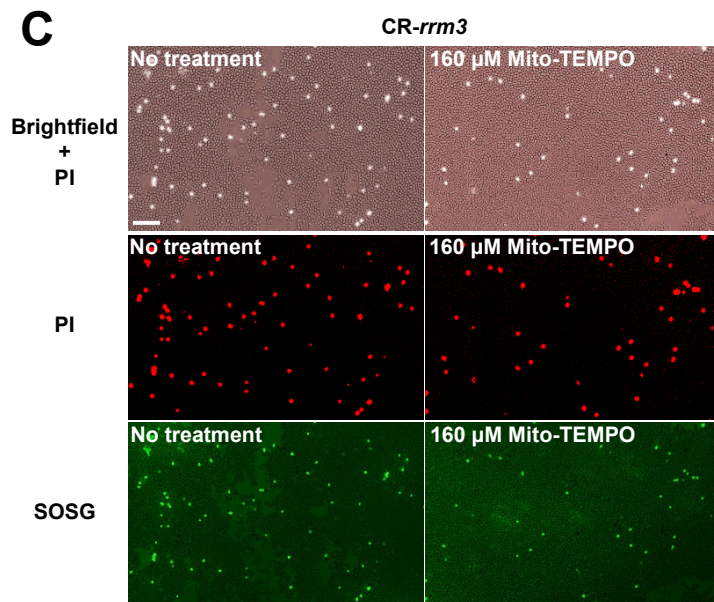

## References

- 1 Schneider, C. A., Rasband, W. S. & Eliceiri, K. W. NIH Image to ImageJ: 25 years of image analysis. *Nat Methods* **9**, 671-675, doi:10.1038/nmeth.2089 (2012).
- 2 Ivessa, A. S., Zhou, J.-Q. & Zakian, V. A. The *Saccharomyces* Pif1p DNA helicase and the highly related Rrm3p have opposite effects on replication fork progression in ribosomal DNA. *Cell* **100**, 479–489 (2000).

Uncropped PCR agarose gel images for Figure 1

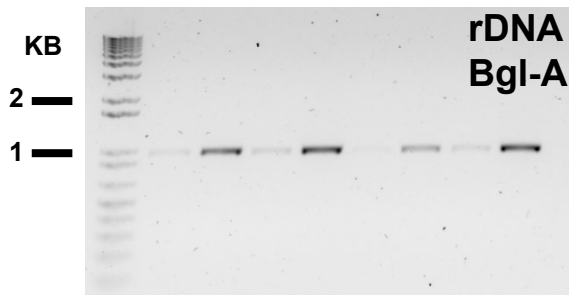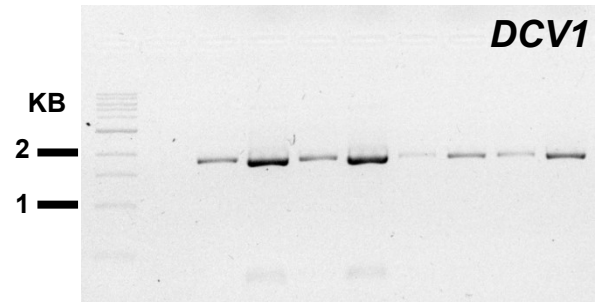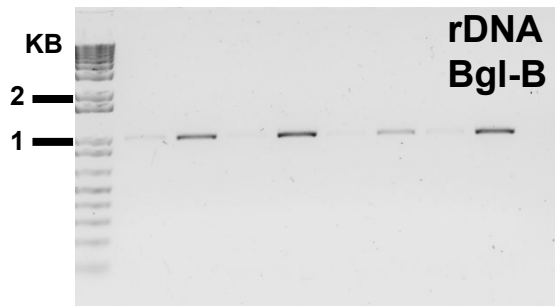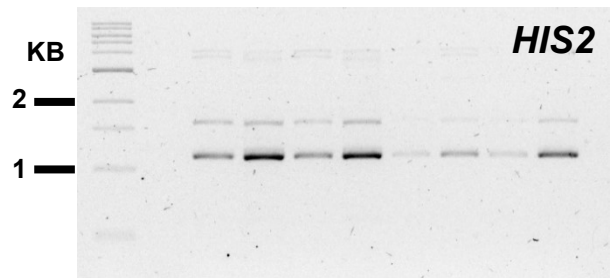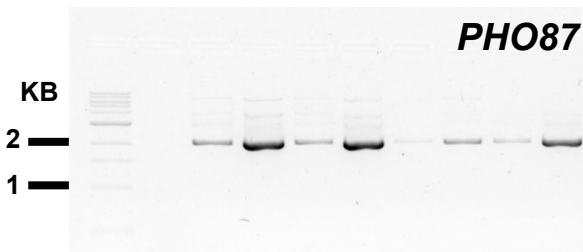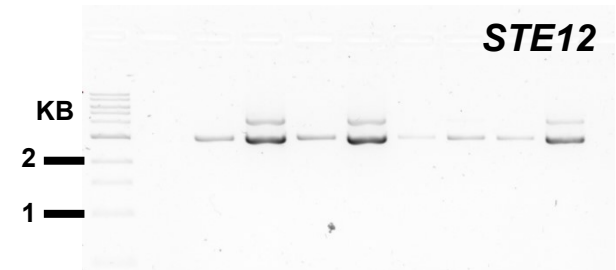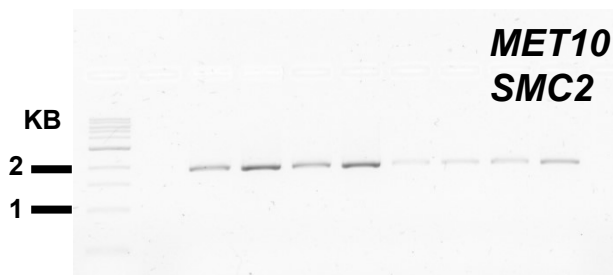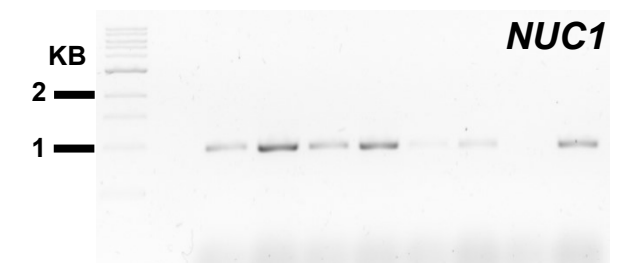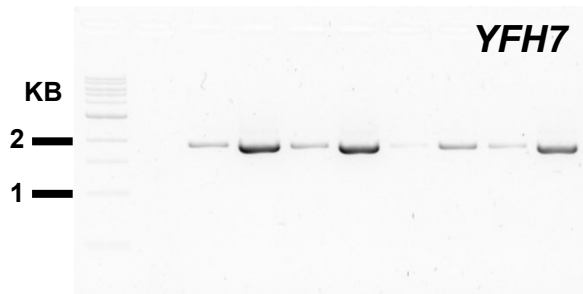

Uncropped PCR agarose gel images for Figures 1 and 3

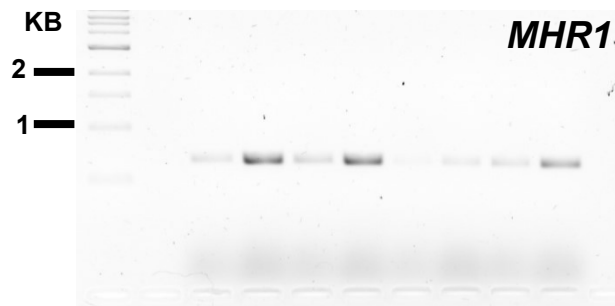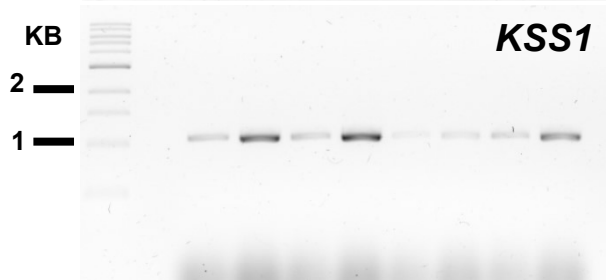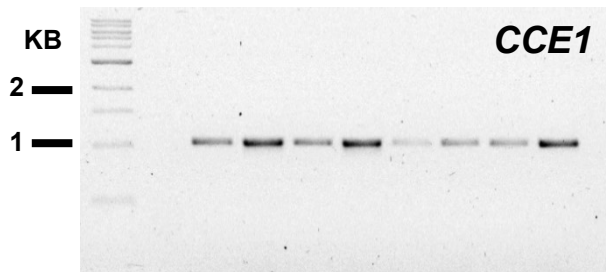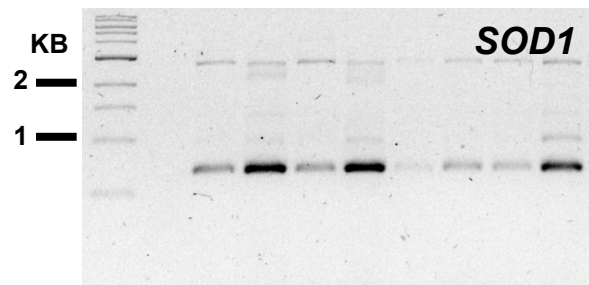

Determination of DNA breakage in sorted cells (PI-staining; Figure 3)

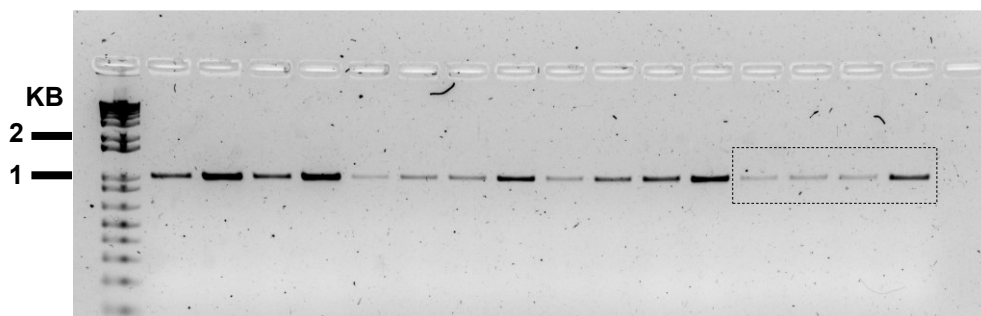

Uncropped western blot images for Figure 4B

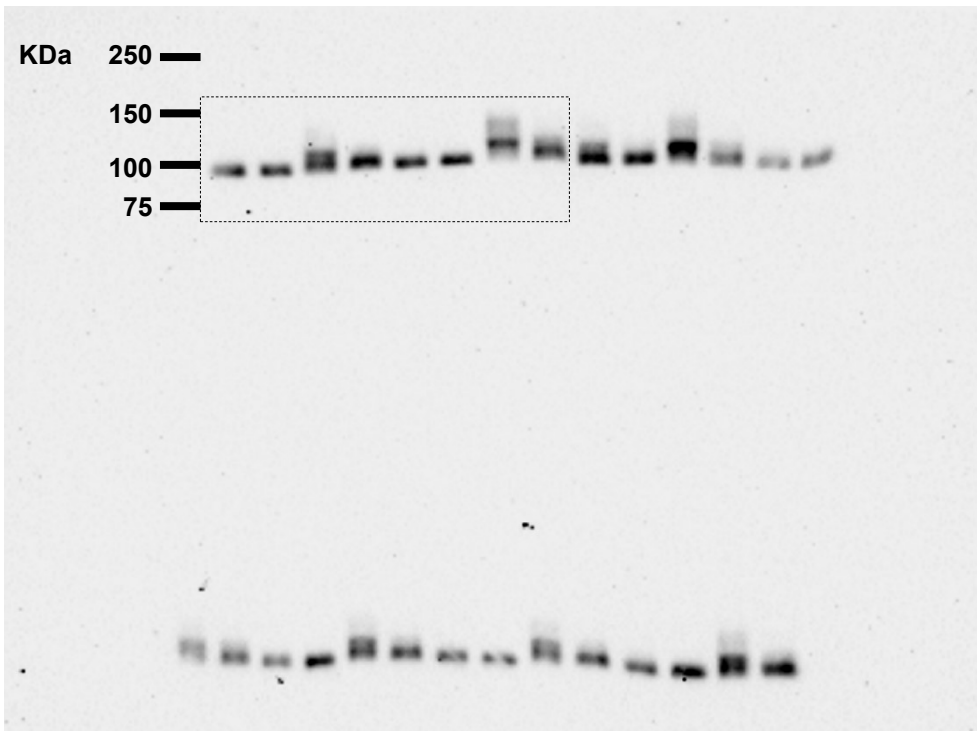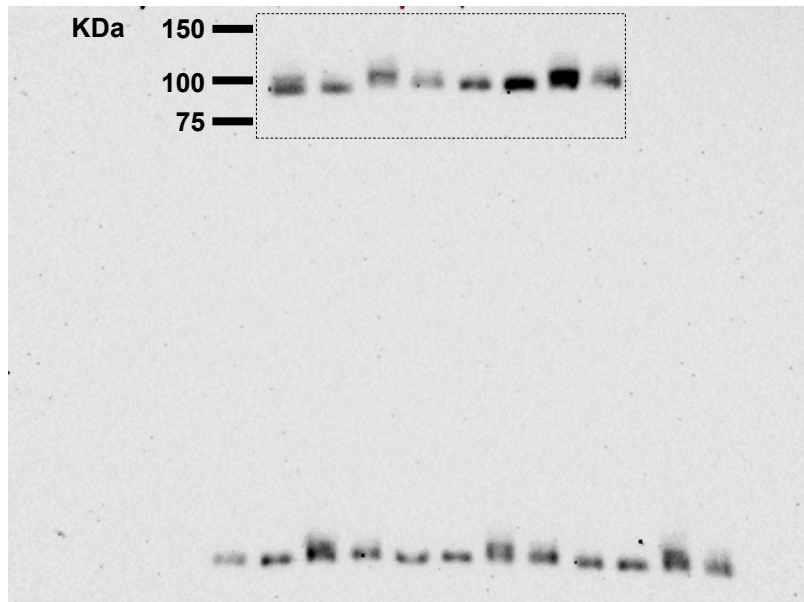



Uncropped western blot images for Figure 4C

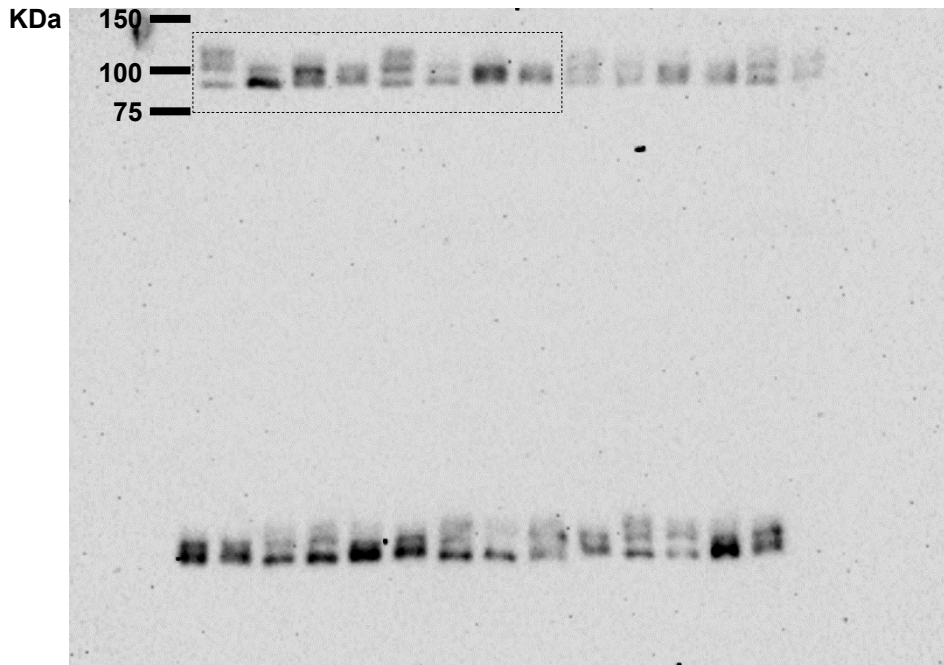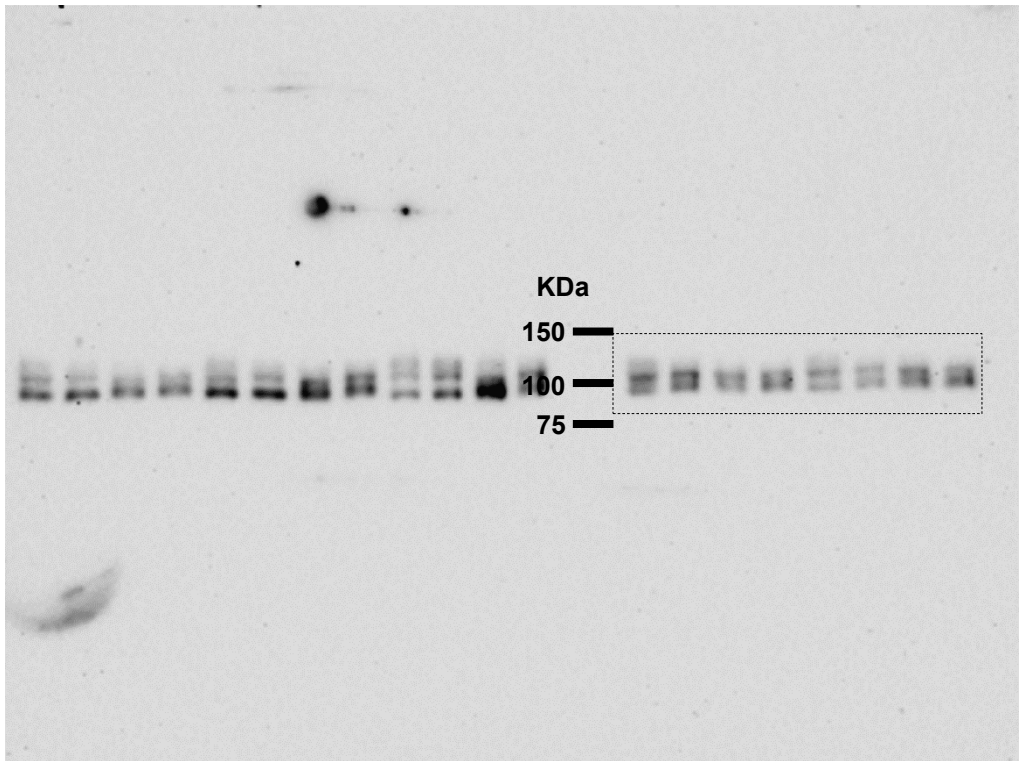

Uncropped western blot images for Figure 4D

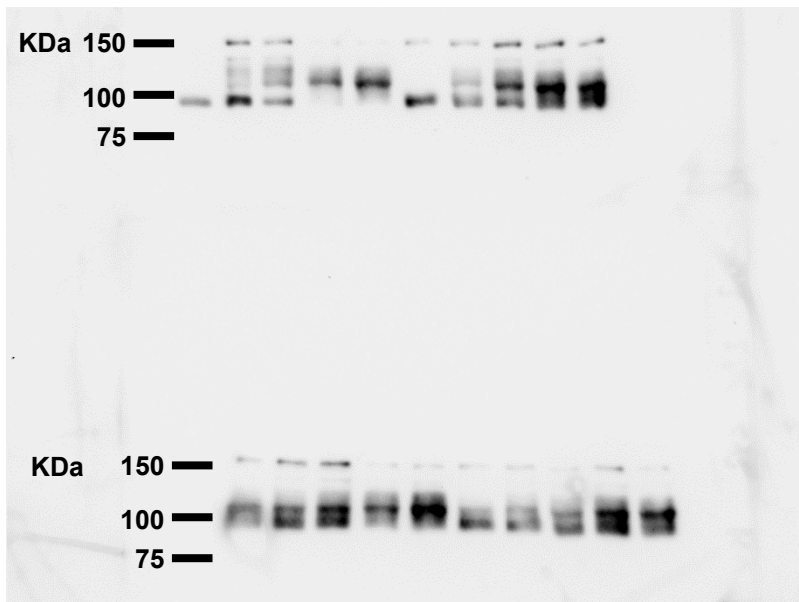

Uncropped western blot images for Figure 5C and 5D

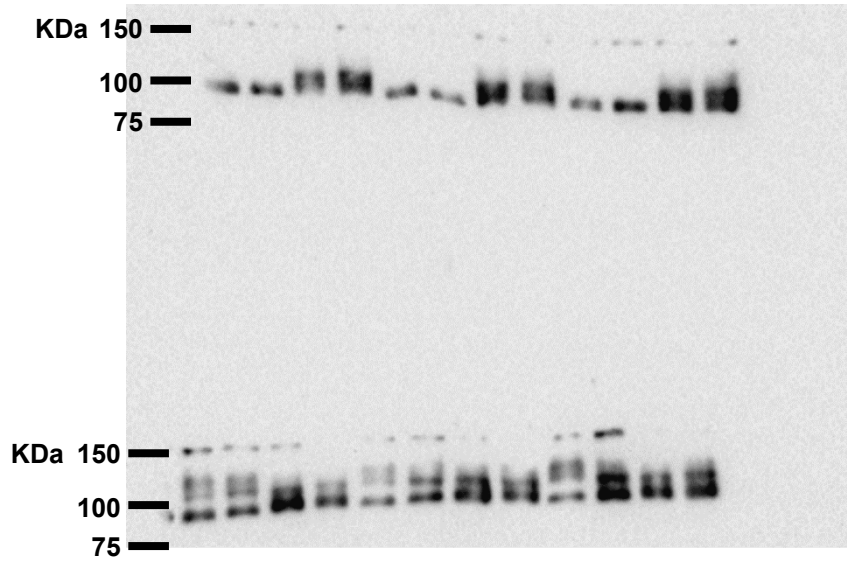

Table S1: Yeast strains used in this study

| Name                                 | Genotype                                                                                 | Source                                       |
|--------------------------------------|------------------------------------------------------------------------------------------|----------------------------------------------|
| VPS106 <i>WT</i>                     | <i>MATa ade2 ade3 leu2-3,112 ura3Δ trp1Δ lys2-801 can1</i>                               | Schulz and Zakian, Cell, 1994 , Vol. 76: 145 |
| VPS106 <i>rrm3</i>                   | <i>MATa ade2 ade3 leu2-3,112 ura3Δ trp1Δ lys2-801 can1 rrm3::TRP1</i>                    | Ivessa et al., Cell, 2000, Vol.100: 479      |
| VPS106 <i>pif1- m2</i>               | <i>MATa ade2 ade3 leu2-3,112 ura3Δ trp1Δ lys2-801 can1 pif1-m2</i>                       | Ivessa et al., Cell, 2000, Vol.100: 479      |
| VPS106 <i>rrm3 pif1- m2</i>          | <i>MATa ade2 ade3 leu2-3,112 ura3Δ trp1Δ lys2-801 can1 rrm3::TRP1 pif1-m2</i>            | Ivessa et al., Cell, 2000, Vol.100: 479      |
| VPS106 <i>hdf1</i>                   | <i>MATa ade2 ade3 leu2-3,112 ura3Δ trp1Δ lys2-801 can1 hdf1::LEU2</i>                    | Ivessa et al., Mol. Cell, 2003, Vol.12: 1525 |
| VPS106 <i>rrm3 hdf1</i>              | <i>MATa ade2 ade3 leu2-3,112 ura3Δ trp1Δ lys2-801 can1 rrm3::TRP1 hdf1::LEU2</i>         | Ivessa et al., Mol. Cell, 2003, Vol.12: 1525 |
| VPS106 <i>rad52</i>                  | <i>MATa ade2 ade3 leu2-3,112 ura3Δ trp1Δ lys2-801 can1 rad52::LEU2</i>                   | Ivessa et al., Cell, 2000, Vol.100: 479      |
| VPS106 <i>rrm3 rad52</i>             | <i>MATa ade2 ade3 leu2-3,112 ura3Δ trp1Δ lys2-801 can1 rrm3::TRP1 rad52::LEU2</i>        | Ivessa et al., Cell, 2000, Vol.100: 479      |
| VPS106 <i>sir2</i>                   | <i>MATa ade2 ade3 leu2-3,112 ura3Δ trp1Δ lys2-801 can1 sir2::LEU2</i>                    | Ivessa et al., Mol. Cell, 2003, Vol.12: 1525 |
| VPS106 <i>rrm3 sir2</i>              | <i>MATa ade2 ade3 leu2-3,112 ura3Δ trp1Δ lys2-801 can1 rrm3::TRP1 sir2::LEU2</i>         | Ivessa et al., Mol. Cell, 2003, Vol.12: 1525 |
| VPS106 <i>sir3</i>                   | <i>MATa ade2 ade3 leu2-3,112 ura3Δ trp1Δ lys2-801 can1 sir3::LEU2</i>                    | Ivessa et al., Mol. Cell, 2003, Vol.12: 1525 |
| VPS106 <i>rrm3 sir3</i>              | <i>MATa ade2 ade3 leu2-3,112 ura3Δ trp1Δ lys2-801 can1 rrm3::TRP1 sir3::LEU2</i>         | Ivessa et al., Mol. Cell, 2003, Vol.12: 1525 |
| VPS106 <i>sir4</i>                   | <i>MATa ade2 ade3 leu2-3,112 ura3Δ trp1Δ lys2-801 can1 sir4::LEU2</i>                    | Ivessa et al., Mol. Cell, 2003, Vol.12: 1525 |
| VPS106 <i>rrm3 sir4</i>              | <i>MATa ade2 ade3 leu2-3,112 ura3Δ trp1Δ lys2-801 can1 rrm4::TRP1 sir2::LEU2</i>         | Ivessa et al., Mol. Cell, 2003, Vol.12: 1525 |
| VPS106 <i>WT</i> pRS315              | <i>MATa ade2 ade3 leu2-3,112 ura3Δ trp1Δ lys2-801 can1 pRS315</i>                        | Ivessa et al., Cell, 2000, Vol.100: 479      |
| VPS106 <i>rrm3</i> pRS315            | <i>MATa ade2 ade3 leu2-3,112 ura3Δ trp1Δ lys2-801 can1 rrm3::TRP1 pRS315</i>             | Ivessa et al., Cell, 2000, Vol.100: 479      |
| VPS106 <i>rrm3</i> pRS-315-RRM3      | <i>MATa ade2 ade3 leu2-3,112 ura3Δ trp1Δ lys2-801 can1 rrm3::TRP1 pRS315-RRM3</i>        | Ivessa et al., Cell, 2000, Vol.100: 479      |
| VPS106 <i>rrm3</i> pRS315-rrm3-K260A | <i>MATa ade2 ade3 leu2-3,112 ura3Δ trp1Δ lys2-801 can1 rrm3::TRP1 pRS315-rrm3-K260A</i>  | Ivessa et al., Cell, 2000, Vol.100: 479      |
| VPS106 <i>rrm3</i> pRS315-rrm3-K260R | <i>MATa ade2 ade3 leu2-3,112 ura3Δ trp1Δ lys2-801 can1 rrm3::TRP1 pRS315-rrm3- K260R</i> | Ivessa et al., Cell, 2000, Vol.100: 479      |
| VPS106 <i>hvk2</i>                   | <i>MATa ade2 ade3 leu2-3,112 ura3Δ trp1Δ lys2-801 can1 hvk2::LEU2</i>                    | this study                                   |
| VPS106 <i>rrm3 hvk2</i>              | <i>MATa ade2 ade3 leu2-3,112 ura3Δ trp1Δ lys2-801 can1 rrm3::TRP1 hvk2::LEU2</i>         | this study                                   |

Table S2: Oligonucleotides used in this study, related to the Key Resources Table

| Name                                                       | Sequence                                    |
|------------------------------------------------------------|---------------------------------------------|
| Primer sequences (Southern blots; Figure 2):               |                                             |
| Primer sequences for rDNA probe (between BglIII and StuI): |                                             |
| RDN-BglIII-F                                               | 5'- CTC TCT CCA CCG TTT GAC                 |
| RDN-StuI-R                                                 | 5'- AGA GAA GTA GAC TGA ACA AGT CTC         |
| Primer sequences for ARS313/314 area and ARS608:           |                                             |
| ARS313-F                                                   | 5'- CAG GTT TGT TTC ATT CAG CGT ATC ATC     |
| ARS313-R                                                   | 5'- TCG GTT ATG GTA TTA GTT CTT CCG TC      |
| ARS314-F                                                   | 5'- ATT ACG CAG ACA AAC GCT AAC AAC G       |
| ARS314-R                                                   | 5'- GAA ATA GGT TTG ATT ACA GCG AAG AAG     |
| ARS608-F1                                                  | 5'- TGT ACC AAC CGT ATC TGG AAA AGC         |
| ARS608-R1                                                  | 5'- CTA ATA GGG TCT TCA GGA CGA G           |
| Primer sequences for tRNA-Y: tY[GUA]F1                     |                                             |
| tRNA_Y-F1                                                  | 5'- GCA TTG ATT ATT TAG GAA GCA CCT C       |
| tRNA_Y-R1                                                  | 5'- GGA CTT ACA GAC CAA ATC CTT TAT AC      |
| tRNA_Y-F2                                                  | 5'- TTC GTA ACA ATT CAA TGG CTT GCC         |
| tRNA_Y-R2                                                  | 5'- GGA GAT TTG ATT TCA GGC GGT G           |
| Primer sequences (TdT assays; Figure 1):                   |                                             |
| Primer sequences for rDNA fragments #1 and #2:             |                                             |
| RDN-Frag_1-F                                               | 5'- CTG TTA TTG CCT CAA ACT TCC ATC         |
| RDN-Frag_1-R                                               | 5'- GAT GGA AGT TTG AGG CAA TAA CAG         |
| RDN-Frag_2-F                                               | 5'- CAC CCA TAA CAC CTC TCA CTC C           |
| RDN-Frag_2-R                                               | 5'- GGA GTG AGA GGT GTT ATG GGT G           |
| Primer sequences for non-rDNA fragments:                   |                                             |
| PHO87 (ARS313-F)                                           | 5'- CAG GTT TGT TTC ATT CAG CGT ATC ATC     |
| PHO87 (ARS313-R)                                           | 5'- TCG GTT ATG GTA TTA GTT CTT CCG TC      |
| MET10/SMC2 (ARS608-F1)                                     | 5'- TGT ACC AAC CGT ATC TGG AAA AGC         |
| MET10/SMC2 (ARS608-R1)                                     | 5'- CTA ATA GGG TCT TCA GGA CGA G           |
| YFH7 (tRNA-F: tF[GAA]F) F                                  | 5'- GCG AAG GCA TTG TTT ACA TGC C           |
| YFH7 (tRNA-F: tF[GAA]F) R                                  | 5'- CCC ATC AAC GGG AGT TAC TCT G           |
| DCV1 (tRNA-Y: tY[GUA]F1) F                                 | 5'- GCA TTG ATT ATT TAG GAA GCA CCT C       |
| DCV1 (tRNA-Y: tY[GUA]F1) R                                 | 5'- GGA CTT ACA GAC CAA ATC CTT TAT AC      |
| HIS2 (tRNA-A: tA[AGC]F) F                                  | 5'- CGC ATA AAG TAG TTC GGG CAG C           |
| HIS2 (tRNA-A: tA[AGC]F) R                                  | 5'- AAG GAG AAA CAT CAA TAA GAG AAT AGT TTG |
| STE12-F                                                    | 5'- CCT CAC ACC CCA TCC TAA ATA TCC         |
| STE12-R                                                    | 5'- CAA CTG TGT ATA TAC TTT GTC GAT AAT AAG |

NUC1-F 5'- CGT TAC ATA TGT GCA GTA GGA TAC TCT TGT CC  
NUC1-R 5'- CTT GAT CTC GAG ATT CCT TTT TTT TGG AGG AGG TAA CAA TTT C  
MHR1-F 5'- CGT TAC ATA TGA AGG TAA ACC ATT CAA TTT CAA G  
MHR1-R 5'- CTT GAT CTC GAG CTG GGA AGA CAC TTC CGT CTG  
KSS1-F 5'- ATG GCT AGA ACC ATA ACT TTT GAT ATC CC  
KSS1-R 5'- CTA TTC CAT GGT CTT CAT TAG TTC ATC  
CCE1-F 5'- ACA GCA CAG AAA GCT AAG ATA TTG  
CCE1-R 5'- TTG TAA GTG TTC TGC AAA AAT TTC AGC  
SOD1-F 5'- AAG AAG ATG GTT TTG GGC AAA TGT TTA GCT G  
SOD1-R 5'- AGC TCC GGC ACA CTT GGT GAA G

Knock-out of HKX2

HXK2delLEU2 F 5'- CTTTGAAAAGGTTGTAGGAATATAATTCTCCACACATAATAAGTACGCTAATTAATAAAcgtttcggtgatgac  
HXK2delLEU2 R 5'- GTTCACATAAGTAGAAAAAGGGCACCTTCTTGTTGTTCAAACCTTAATTTACAAATTAAGTttcctgatgcggtatcttctct

HXK2\_F 5'- CTA TAA AAA AGA GTA ATC CTA CCC CAT ATC  
HXK2\_R 5'- CAG TTG TAA AAG TAA GAA AAA AAA AGA TCA TAG

Table S3: Key Resource Table

| <b>Reagent or Resource</b>                           | <b>Source</b>                           | <b>IDENTIFIER</b>                                                                                                                                         |
|------------------------------------------------------|-----------------------------------------|-----------------------------------------------------------------------------------------------------------------------------------------------------------|
| MasterPure™ purification kit                         | Epicentre, Madison, WI                  | MPY80200                                                                                                                                                  |
| Hoechst Dye #33258                                   | Sigma-Aldrich, St. Louis, MO            | B2883                                                                                                                                                     |
| <b>Antibodies</b>                                    |                                         |                                                                                                                                                           |
| anti-Rad53 antibody                                  | abcam, Cambridge, MA                    | ab104232                                                                                                                                                  |
| Goat Anti-Rabbit IgG (H + L)-horse radish peroxidase | Bio-Rad™ Laboratories, Hercules, CA     | 1706515                                                                                                                                                   |
| <b>Chemical, Peptides, Recombinant Proteins</b>      |                                         |                                                                                                                                                           |
| Biotin-14-dCTP                                       | Invitrogen, Carlsbad, CA                | 19518-018                                                                                                                                                 |
| Streptavidin-coated magnetic beads                   | NEB, Ipswich, MA                        | S1420S                                                                                                                                                    |
| Spermine                                             | Sigma-Aldrich, St. Louis, MO            | 85590                                                                                                                                                     |
| Spermidine                                           | Sigma-Aldrich, St. Louis, MO            | S2626                                                                                                                                                     |
| Propidium iodide                                     | Sigma-Aldrich, St. Louis, MO            | P4170                                                                                                                                                     |
| Singlet Oxygen Sensor Green, SOSG                    | Invitrogen/Molecular Probes, Eugene, OR | S36002                                                                                                                                                    |
| MitoTracker® Red CMXRos                              | Invitrogen/Molecular Probes, Eugene, OR | M7512                                                                                                                                                     |
| Sirtinol                                             | Sigma-Aldrich, St. Louis, MO            | S7942                                                                                                                                                     |
| Mito-TEMPO                                           | Sigma-Aldrich, St. Louis, MO            | SML0737                                                                                                                                                   |
| Fluorescein diacetate                                | Sigma-Aldrich, St. Louis, MO            | F7378                                                                                                                                                     |
| <b>Experimental Models: Organisms/Strains</b>        |                                         |                                                                                                                                                           |
| Baker's yeast ( <i>Saccharomyces cerevisiae</i> )    | see attached table                      |                                                                                                                                                           |
| <b>Oligonucleotides</b>                              |                                         |                                                                                                                                                           |
|                                                      | see attached table                      |                                                                                                                                                           |
| <b>Software and Algorithms</b>                       |                                         |                                                                                                                                                           |
| ImageLab                                             | Bio-Rad™ Laboratories, Hercules, CA     | <a href="https://www.bio-rad.com/en-us/product/image-lab-software?ID=KRE6P5E8Z">https://www.bio-rad.com/en-us/product/image-lab-software?ID=KRE6P5E8Z</a> |
| ImageJ                                               |                                         | <a href="https://imagej.net/ij/index.html">https://imagej.net/ij/index.html</a>                                                                           |
